|                                                                                                                                                                                                                                                                                                                                                                                                                                                                                                                                                                                                                                                                                                                                                                                                                                                                                                                                                                                                                                                                                                                                                                                                                                                                                                                                                                                                                                                                                                                                                                                                                                                                                                                                                                                                                                                                                                                                                                                                                                                                                                                                                                                                                                                                                                                                                                                                                                                                                                                                                                                                          |                                                                                                                                                                                                                                                                                                                                                                                                                                                                                                                                                                                                                                                                                                                                                                                                                                                                                                                                                                                                                                                                                                                                                                                                                                                                                                                                                                                                                                                                                                                                                                                                                                                                                                                                                                                                                                                                                                                                                                                                                   |
|----------------------------------------------------------------------------------------------------------------------------------------------------------------------------------------------------------------------------------------------------------------------------------------------------------------------------------------------------------------------------------------------------------------------------------------------------------------------------------------------------------------------------------------------------------------------------------------------------------------------------------------------------------------------------------------------------------------------------------------------------------------------------------------------------------------------------------------------------------------------------------------------------------------------------------------------------------------------------------------------------------------------------------------------------------------------------------------------------------------------------------------------------------------------------------------------------------------------------------------------------------------------------------------------------------------------------------------------------------------------------------------------------------------------------------------------------------------------------------------------------------------------------------------------------------------------------------------------------------------------------------------------------------------------------------------------------------------------------------------------------------------------------------------------------------------------------------------------------------------------------------------------------------------------------------------------------------------------------------------------------------------------------------------------------------------------------------------------------------------------------------------------------------------------------------------------------------------------------------------------------------------------------------------------------------------------------------------------------------------------------------------------------------------------------------------------------------------------------------------------------------------------------------------------------------------------------------------------------------|-------------------------------------------------------------------------------------------------------------------------------------------------------------------------------------------------------------------------------------------------------------------------------------------------------------------------------------------------------------------------------------------------------------------------------------------------------------------------------------------------------------------------------------------------------------------------------------------------------------------------------------------------------------------------------------------------------------------------------------------------------------------------------------------------------------------------------------------------------------------------------------------------------------------------------------------------------------------------------------------------------------------------------------------------------------------------------------------------------------------------------------------------------------------------------------------------------------------------------------------------------------------------------------------------------------------------------------------------------------------------------------------------------------------------------------------------------------------------------------------------------------------------------------------------------------------------------------------------------------------------------------------------------------------------------------------------------------------------------------------------------------------------------------------------------------------------------------------------------------------------------------------------------------------------------------------------------------------------------------------------------------------|
| <p><b>A)</b></p> <p>Lv-vegf3 1 MGPSVDSKPGDRLSRVGLLD-ISGNT-VLCETTRARDACHCSRVDADGN 48<br/> Sp-vegf3 1 MGHSAEATFMDRLSPVGSFD-LSGNT-VLSGTSVGRVDSCKCSHYDADGR 48<br/> Pl-vegf3 1 MGQSFPEARFMDRLSRVGSFNLGRSNGPNSGTKSAARDSCQCSYLDDQAR 50<br/> * * * . . * * * . * * * . * . * . * . * * . * * *</p> <p>Lv-vegf3 49 RVTERVDHAHFKLSSTTSPCASHATHNQVNSLSRPLRHSRSMRTPLS 98<br/> Sp-vegf3 49 RVFERVDRAQFTDVSSTSYPCASHMTHNQVNSLSRPLRHSRSMRTPLS 98<br/> Pl-vegf3 51 RVIERVDHAHIT---TTTSHPCASHHTHTHMNSTLRVDVCHARSCLTPAS 97<br/> * * * * * . * . * * * * * * * * * * * * * * * * * * * * *</p> <p>Lv-vegf3 99 S-----SSAHSDSVLSQ--KATTTTTDLRNSHASWSLSCWF 136<br/> Sp-vegf3 99 ATTSLSSTSSSSSHDVSFSSK--KAATATTPDLRNSNASLSC-CWF 144<br/> Pl-vegf3 98 TSSS---SSSSSHRDSVLSKRVTTTTTTTDLRNSHASLSCSWF 142<br/> * * * * * * * * * * * * * * * * * * * * * * * * * * * * *</p> <p>Lv-vegf3 137 SRRMYTGNIKPWTLSFMFYLFVLIILSHQVESTHSVPALSR--RVDQRTNN 184<br/> Sp-vegf3 145 SRRMYMGNITPWTLSFMFYLFVLIILSHQVESTHSVPALSRVTVQQRMRK 194<br/> Pl-vegf3 143 SRRMYMGNIKPWTLSFIFYLFVIVLSHQVESTHSVPLSQR-VIEERMK 191<br/> * * * * * * * * * * * * * * * * * * * * * * * * * * * * *</p> <p>Lv-vegf3 185 MNALEDYLNALSLNGTNTPRSRFYFNRSRPSALNKRSYRRLGRAGSYSGSR 234<br/> Sp-vegf3 195 VNSLEDYLNALSLNDTDTPRSRFYFNRSRPSALNKRSYRRLGRAGSAGSS 244<br/> Pl-vegf3 192 VNSLEEYLSALSNGTSTLRSRYLNRSPALNKRSYRRLGRAGSAG-L 240<br/> * . * * * * * * * * * * * * * * * * * * * * * * * * * * *</p> <p>Lv-vegf3 235 INNAFMAKIEDERARVQCQPRDRVVDVSYEELGIPRGYDFFLLPECIVVRR 284<br/> Sp-vegf3 245 SDSAFFARLEDENARVQCQPRDRVVDVSYEELGIPRGYDFFLYPECIVVRR 294<br/> Pl-vegf3 241 QNSAFLARLEDENARVQCQPRDRVVDVSYEELGIPRGYDFFLYPECIVVRR 290<br/> * * * * * * * * * * * * * * * * * * * * * * * * * * * * *</p> <p>Lv-vegf3 285 CKQGGCCGDDQECVPSRTTNTMNFQVQRQIPIEIVHETVHDLCECQD 334<br/> Sp-vegf3 295 CKQGGCCGDERECVPSRTTNTMNFQVQRQIPIEIVHETVHDLCECQD 340<br/> Pl-vegf3 291 CKQGGCCGDERECVPSRTTNTMNFQVQRQIPIEIVHETVHDLCECQD 336<br/> * * * * * * * * * * * * * * * * * * * * * * * * * * * * *</p> <p>Lv-vegf3 335 KPSFCPEPVVDCPDDKVVSYSECTCKCRNRCPKPFQDEDTCCGDCLSQD 384<br/> Sp-vegf3 341 KPSFCPEPVVDCPDNKVVSYSECTCKCRNRCPKPFQDEDTCCGDCLSQD 390<br/> Pl-vegf3 337 KPSFCPEPVVDCPNNKVVSYSECTCKCRNRCPKPFQDEDTCCGDCLSQD 386<br/> * * * * * * * * * * * * * * * * * * * * * * * * * * * * *</p> <p>Lv-vegf3 385 RHCKNIYGRNRNGKLSQEEDCVRKGLCGKPPCINGAFSISDCKCINSNS 434<br/> Sp-vegf3 391 RNCKNIYGRNRNGKLSREEDCVRKGLCGKPPCINGGFSISDCKCINSNS 440<br/> Pl-vegf3 387 RNCKNIYGRNRNGKLSREEDCVRKGLCGYPPCINGGFSISDCKCINSNS 436<br/> * . * * * * * * * * * * * * * * * * * * * * * * * * * * *</p> | <p><b>B)</b></p> <p>Lv-fgfa 1 MKPKMDENYWWSSTIPASKRASHVIIIGFLCVSLAAGLSDGGMTRREH 50<br/> Sp-fgfa 1 MKPKMDES CWWSSTIPASKRASHVIIIGFLCVLTLAAGLSDGGGLQTRREQ 50<br/> Pl-fgfa 1 MKAKMDES GWWSSTIPASKRASHVIIIGFLCVSLAAGLSDGGGLQTRREH 50<br/> * * * * * * * * * * * * * * * * * * * * * * * * * * * * *</p> <p>Lv-fgfa 51 ADTRQHHNQHQIHTISATIRD-ADNSALLXNILAKKSASISTDSAAK 99<br/> Sp-fgfa 51 ADTRQHHNQ-QQPHTISATIRD-ADNSVLLHNLATKNSASISTDSAT 98<br/> Pl-fgfa 51 ADTRQHHNQ-QQLHTLSATIRDADNSLHNLATKNSAQISKDSATG 99<br/> * * * * * . * * * * * * * * * * * * * * * * * * * * * * *</p> <p>Lv-fgfa 100 EGHKSSNSVSNINQ-IKLSNITSSS-TLSKLTASVLSRLNS-SPPSS 146<br/> Sp-fgfa 99 G-HKSS-SLSNINQ-IKVSNITSSS-STISKLTASVLSRLNS-LPPSS 143<br/> Pl-fgfa 100 H-HSSSHSNNNINQIKVSNITSSSSTLSKLTASVLSRLNSKSPIS 148<br/> * * * * * * * * * * * * * * * * * * * * * * * * * * * * *</p> <p>Lv-fgfa 147 SSGSNRTEQGERLHSWSPMNSDSSLQHHLRGTSQADAEPSRRVRRKASSR 196<br/> Sp-fgfa 144 SSGSNRTERGERLHSWSPMNSDSSLQHHLRGTSQADAEPSRRVRRKASSR 193<br/> Pl-fgfa 149 SSGLSRRDQGESLRSRSMNSANSTLPHLRFSPQADAVPSNRVRRKASSR 198<br/> * * * * * . * * * * * * * * * * * * * * * * * * * * * * *</p> <p>Lv-fgfa 197 G---SPLIYNSKQPTQLFCRTNFR LAVHEDGTINGTRDNMDVYSSLYIQS 243<br/> Sp-fgfa 194 G---STLIYNSKQPTQLFCRTNFR LAVHEDGTINGTRDNMDVYSSLYIQS 240<br/> Pl-fgfa 199 GGNNNPLIYKAKQPTQLFCRTNFR LAVHEDGTINGTRDNMDVYSSLYIQS 248<br/> * * * * * * * * * * * * * * * * * * * * * * * * * * * * *</p> <p>Lv-fgfa 244 QRRSIVSIKGLKSLYVCVDDNGLYGNRRVSRNCFQEKLEPNFFNTYA 293<br/> Sp-fgfa 241 QRRSIVSIKGLASLYVCVDDSGSLYGDTRVSRNCFQEKLEPNFFNTYA 290<br/> Pl-fgfa 249 QRRSIVSIKGLASLYVCVDDNGLYGANRVSRNCFQEKLEPNFFNTYA 298<br/> * * * * * * * * * * * * * * * * * * * * * * * * * * * * *</p> <p>Lv-fgfa 342 YKMPDSTNKRHR-HRTLFLSINKYGESRIAKVTKKKAQFIPLVPEPELL 342<br/> Sp-fgfa 291 YKMPDSTSKRRR-HRTLFLSINKYGESRIAKVTKKKAQFIPLVPEPELL 339<br/> Pl-fgfa 299 YKMPDSTNKRHRKHTPFLSINKYGESRIAKVTKKKAQFIPLVPEPELL 348<br/> * * * * * * * * * * * * * * * * * * * * * * * * * * * * *</p> |
|----------------------------------------------------------------------------------------------------------------------------------------------------------------------------------------------------------------------------------------------------------------------------------------------------------------------------------------------------------------------------------------------------------------------------------------------------------------------------------------------------------------------------------------------------------------------------------------------------------------------------------------------------------------------------------------------------------------------------------------------------------------------------------------------------------------------------------------------------------------------------------------------------------------------------------------------------------------------------------------------------------------------------------------------------------------------------------------------------------------------------------------------------------------------------------------------------------------------------------------------------------------------------------------------------------------------------------------------------------------------------------------------------------------------------------------------------------------------------------------------------------------------------------------------------------------------------------------------------------------------------------------------------------------------------------------------------------------------------------------------------------------------------------------------------------------------------------------------------------------------------------------------------------------------------------------------------------------------------------------------------------------------------------------------------------------------------------------------------------------------------------------------------------------------------------------------------------------------------------------------------------------------------------------------------------------------------------------------------------------------------------------------------------------------------------------------------------------------------------------------------------------------------------------------------------------------------------------------------------|-------------------------------------------------------------------------------------------------------------------------------------------------------------------------------------------------------------------------------------------------------------------------------------------------------------------------------------------------------------------------------------------------------------------------------------------------------------------------------------------------------------------------------------------------------------------------------------------------------------------------------------------------------------------------------------------------------------------------------------------------------------------------------------------------------------------------------------------------------------------------------------------------------------------------------------------------------------------------------------------------------------------------------------------------------------------------------------------------------------------------------------------------------------------------------------------------------------------------------------------------------------------------------------------------------------------------------------------------------------------------------------------------------------------------------------------------------------------------------------------------------------------------------------------------------------------------------------------------------------------------------------------------------------------------------------------------------------------------------------------------------------------------------------------------------------------------------------------------------------------------------------------------------------------------------------------------------------------------------------------------------------------|

Supplementary Fig. 1: Analysis of VEGF3 and FGFA proteins in *L. variegatus*, *S. purpuratus* and *P. lividus*. ClustalW alignment of the of VEGF3 (A) and FGFA (B) protein sequences in *L. variegatus*, *S. purpuratus* and *P. lividus* show that VEGF3 proteins are 70% identical (A) and FGFA proteins are 80% identical among the three species of sea urchin. Asterisks show identical amino acids, and dashes show conserved amino acids.

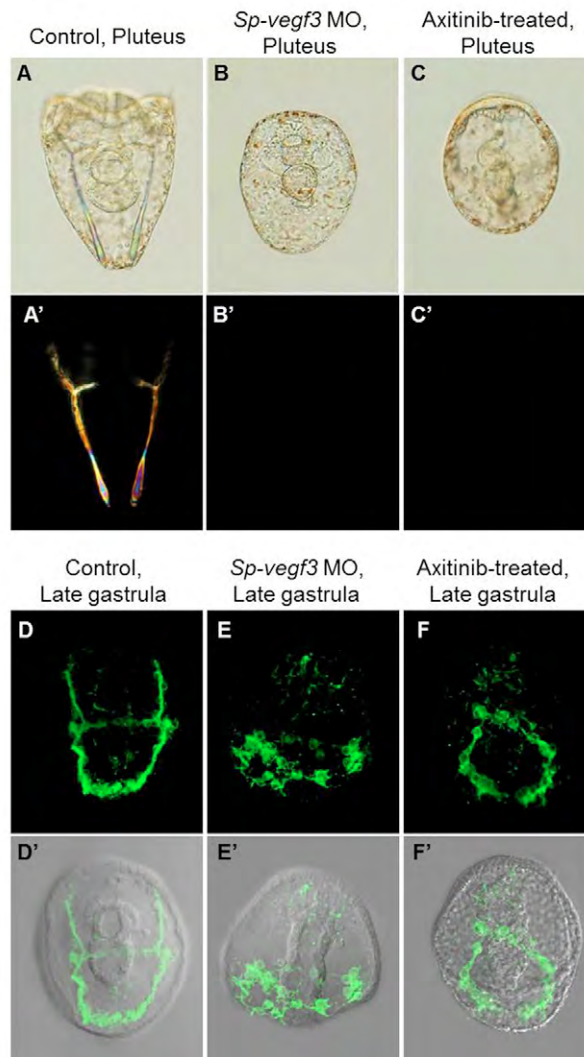

Supplementary Fig. 2: Perturbation of VEGF signaling in *S. purpuratus* inhibits PMC migration and skeletogenesis. DIC (A-C) and polarized light (A'-C') images of *S. purpuratus* control embryo (A, A'), *vegf3* morphant embryo (B, B') and embryo treated with 50nM axitinib from the 2-cell stage (C, C') show that skeletogenesis is inhibited in *Sp-vegf3* morphants and axitinib-treated embryos. Fluorescence (D-F), and merged images with DIC (D'-F') of control embryo (D, D'), *Sp-vegf3* morphants (E, E') and axitinib-treated embryos (F, F') at the late gastrula stage show by 6a9 immunostaining that PMC migration is perturbed in *Sp-vegf3* morphants and axitinib-treated embryos.

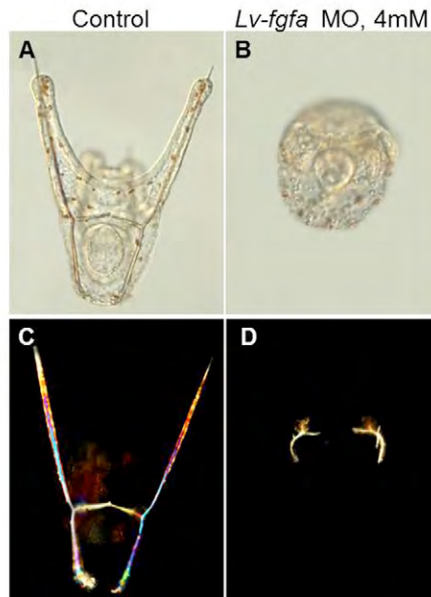

Supplementary Fig. 3: Knockdown of *Lv-fgfa* using a translation-blocking MO leads to the formation of truncated skeletal elements. DIC (A-B) and polarized light (C-D) images of control embryo (A, C) and embryo injected with 4 mM *Lv-fgfa* translation-blocking MO (B, D) show that shortened skeletal elements form in *Lv-fgfa* morphants.

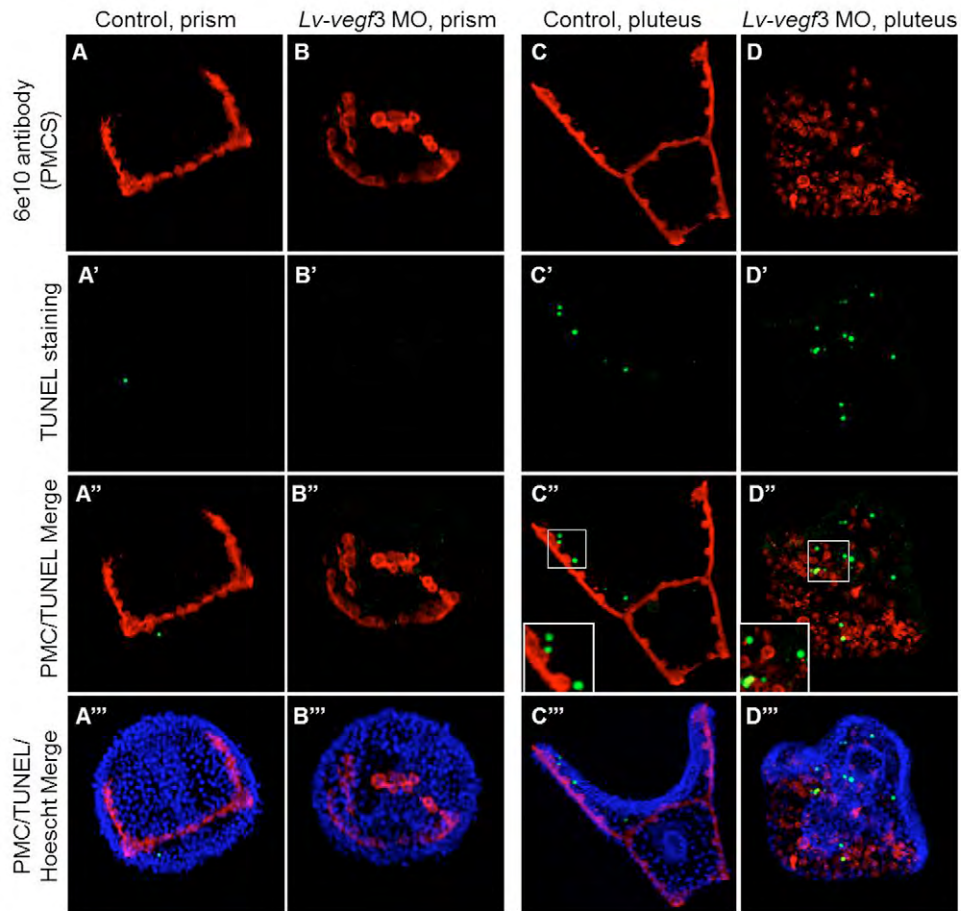

Supplementary Fig. 4: PMCs in *Lv-veg3* morphants are not undergoing apoptosis. Fluorescence images of 6e10 antibody labeled-PMCs (A-D), TUNEL staining (A'-D'), 6e10/TUNEL merged images (A''-D'') and 6e10/TUNEL/Hoechst merged images (A'''-D'''). Though there is a general increase in the number of apoptotic cells from the prism stage (A-A'', B-B'') to the pluteus stage (C-C'', D-D'') in both controls (A-A'', C-C'') and *Lv-veg3* morphant embryos (B-B'', D-D''), there is no apparent correlation between the position of apoptotic cells and PMCs, either in control embryos or in *Lv-veg3* morphants (C'' and D'', inserts).

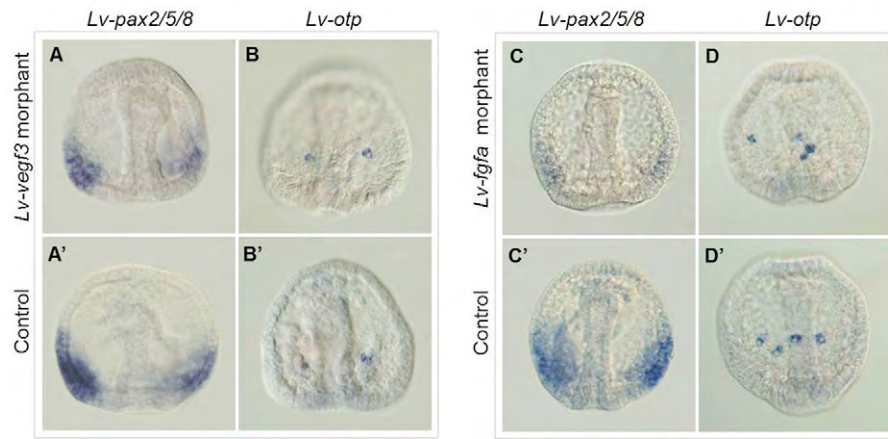

Supplementary Fig. 5: WMISH analysis of *Lv-pax2/5/8* (A, A', C, C') and *Lv-otp* (B, B', D, D') expression in *Lv-veg3* morphants (A, B), *Lv-fgfa* morphants (C, D) and controls (A'-D') at the late gastrula stage show that *Lv-pax2/5/8* expression is not strongly affected in *Lv-veg3* morphants (A), while its expression is downregulated in *Lv-fgfa* morphants (C). *Lv-otp* expression is not affected in either *Lv-veg3* (B) or *Lv-fgfa* (D) morphants.

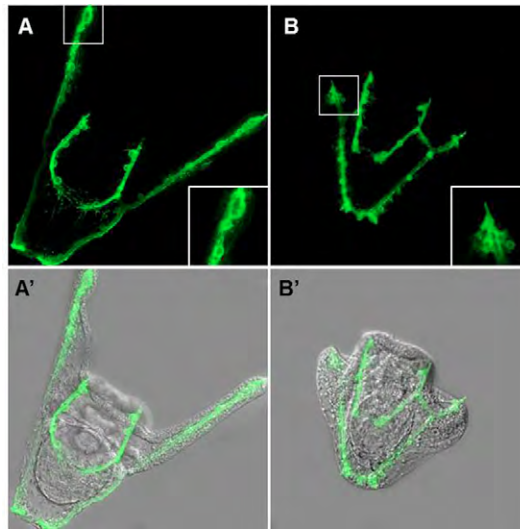

Supplementary Fig. 6: Blocking VEGF signaling at later stages does not affect the location of PMCs along the skeletal rods. Fluorescence (A, B) and merged images with DIC (A', B') of pluteus embryos treated with DMSO (A, A') or axitinib (B, B') from the late gastrula stage. PMCs are visible along the skeletal rods and at the tips of the body rods (A, B, inserts) in both control and axitinib-treated embryos.

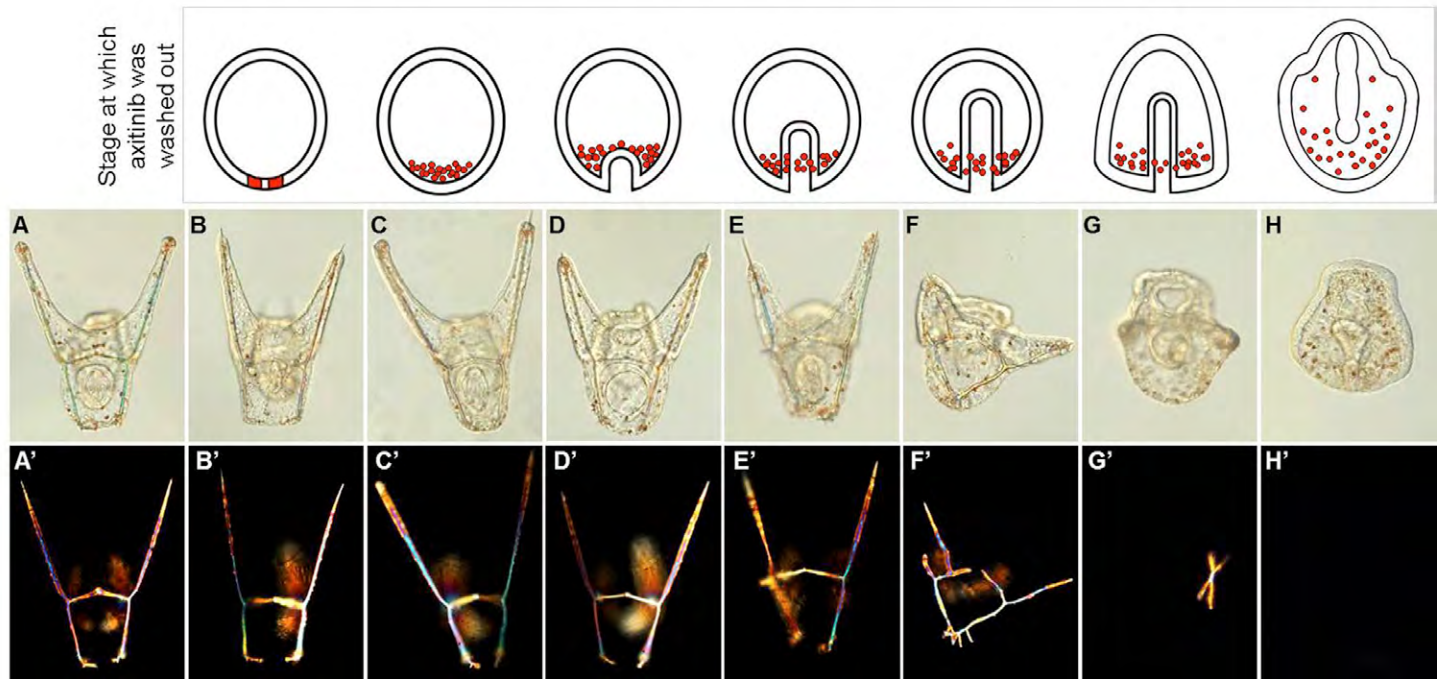

Supplementary Fig. 7: The effects of VEGFR inhibition are reversible early in development. DIC (A-H) and polarized light (A'-H') images of control embryo (A- A'), and embryos treated with the VEGFR inhibitor axitinib at the 2-cell stage and washed out of the drug at hatched blastula (B, B'), mesenchyme blastula (C, C'), early gastrula (D, D'), mid-gastrula (E, E'), late gastrula (F, F'), prism (G, G') and pluteus (H, H') stages. Embryos are able to recover and secrete skeletal elements comparable to controls if VEGFR inhibition is alleviated prior to the late gastrula stage (B'-E'), and truncated skeletal elements are secreted if the inhibitor is washed out at late gastrula or prism (F', G'). Embryos do not form skeletal elements if axitinib is washed out at the pluteus stage (H'). Schematic diagrams indicate the stage of development at which axitinib was washed out of embryo cultures (PMCs are represented in red).

| OBSERVED PHENOTYPE                                                  | STAGE AT WHICH AXITINIB WAS WASHED OUT |             |                  |             |                     |             |                |             |              |             |               |             |            |             |            |            |
|---------------------------------------------------------------------|----------------------------------------|-------------|------------------|-------------|---------------------|-------------|----------------|-------------|--------------|-------------|---------------|-------------|------------|-------------|------------|------------|
|                                                                     | DMSO CONTROL                           |             | HATCHED BLASTULA |             | MESENCHYME BLASTULA |             | EARLY GASTRULA |             | MID-GASTRULA |             | LATE GASTRULA |             | PRISM      |             | PLUTEUS    |            |
|                                                                     | #                                      | %           | #                | %           | #                   | %           | #              | %           | #            | %           | #             | %           | #          | %           | #          | %          |
| NO SKELETON                                                         | 0                                      | 0           | 0                | 0           | 0                   | 0           | 0              | 0           | 0            | 0           | 3             | 1.3         | 42         | 16.3        | <b>236</b> | <b>100</b> |
| TINY SKELETAL DEPOSITS (SPECKS)                                     | 0                                      | 0           | 0                | 0           | 0                   | 0           | 0              | 0           | 0            | 0           | 0             | 0           | 15         | 5.8         | 0          | 0          |
| BRANCHED SKELETAL RUDIMENTS                                         | 2                                      | 0.9         | 9                | 3.6         | 5                   | 2.3         | 11             | 4.3         | 5            | 2.1         | <b>116</b>    | <b>49.8</b> | <b>183</b> | <b>70.9</b> | 0          | 0          |
| EXTENDED RODS, WITH PROMINENT BODY AND DORSOVENTRAL CONNECTING RODS | 0                                      | 0           | 0                | 0           | 2                   | 0.9         | 1              | 0.4         | 0            | 0           | 0             | 0           | 7          | 2.7         | 0          | 0          |
| SHORT PLUTEUS SKELETON                                              | 10                                     | 4.4         | 31               | 12.4        | 26                  | 11.9        | 28             | 11.0        | 61           | 26.0        | 114           | 48.9        | 11         | 4.3         | 0          | 0          |
| WILD TYPE PLUTEUS SKELETON                                          | <b>214</b>                             | <b>94.7</b> | <b>211</b>       | <b>84.0</b> | <b>185</b>          | <b>84.9</b> | <b>215</b>     | <b>84.3</b> | <b>169</b>   | <b>71.9</b> | 0             | 0           | 0          | 0           | 0          | 0          |
| <b>TOTAL</b>                                                        | 226                                    | 100         | 251              | 100         | 218                 | 100         | 255            | 100         | 235          | 100         | 233           | 100         | 258        | 100         | 236        | 100        |

Supplementary Table 1: Distribution of phenotypes in axitinib washout experiments. Bold type indicates prevalent phenotype for drug washout at each stage of development.

Supplementary Table 2: List of probes used in Nanostring nCounter analyses (excel document).

[Download Table S2](#)

Supplementary Table 3: Complete table of results obtained from Nanostring nCounter analysis of changes in gene expression between control and either axitinib treated embryos or *Sp-veg3* morphants (excel document). Table shows, for all three trials conducted, the numbers of transcripts counted in control and either axitinib treated embryos or *Sp-veg3* morphants, the percentage changes in transcript numbers between controls and either axitinib treated embryos or *Sp-veg3* morphants, and the average percentage changes obtained.

[Download Table S3](#)

| Primer Name                              | Primer Sequence                      |
|------------------------------------------|--------------------------------------|
| <i>Lv-fgfa</i> forward degenerate primer | 5'-CAYGARGAYGGNACNATHAAYGG-3'        |
| <i>Lv-fgfa</i> reverse degenerate primer | 5'-GGDATRAAYTGNGCYTTYTTYTG-3'        |
| <i>Lv-veg3</i> forward degenerate primer | 5'-CGTGTGGTGGAYTCGTACGAGGAGCTG-3'    |
| <i>Lv-veg3</i> reverse degenerate primer | 5'-GGCACTTGCAGGTRCACTCGCTG-3'        |
| <i>Lv-veg3</i> 5' RACE primer            | 5'-CTGCACCCGTGCCCTCTCATCCTCAA-3'     |
| <i>Lv-veg3</i> 3' RACE primer            | 5'-GGAGCTGGGCATCCCCAGAGGGTAT-3'      |
| <i>Lv-fgfa</i> 3' RACE primer            | 5'-GTCGCAGAGGCGGAGTATTGTTTCCAT-3'    |
| <i>Lv-pax2/5/8</i> forward primer        | 5'-GATAGAATTCGCCAGCACGTTGTCTGA-3'    |
| <i>Lv-pax2/5/8</i> reverse primer        | 5'-GCAGTCTAGATGTGGCGATATCACCC-3'     |
| <i>Lv-otp</i> forward primer             | 5'-GGTCGAATTCATGGAGCGAACTCTAG -3'    |
| <i>Lv-otp</i> reverse primer             | 5'-GGCATC TAGACT AAAGATTCCCATTGA -3' |
| <i>Lv-fgfa</i> forward RT-PCR primer     | 5'-GGTTGCATAGCTGGAGCCCAATGA-3'       |
| <i>Lv-fgfa</i> reverse RT-PCR primer     | 5'-CCTTTTGTGGTGTCTGTCTGGCATC-3'.     |

Supplementary Table 4: List of primers.

| MO Name                                | MO Sequence                      |
|----------------------------------------|----------------------------------|
| <i>Lv-fgfa</i> splice-blocking MO      | 5'-TAATAAACCCCTACTTACGTTTCCGT-3' |
| <i>Lv-fgfa</i> translation blocking MO | 5'-GTCGCACACAGACGATGTCCAACGC-3'  |
| <i>Lv-veg3</i> translation-blocking MO | 5'-TCGACTGAAGGTCCCATCGTGCTTT-3'  |
| <i>Sp-veg3</i> translation-blocking MO | 5'-GGCTGAGTGCCCCATCGTGCTTCAA-3'  |
| Standard control MO                    | 5'-CCTCTTACCTCAGTTACAATTTATA-3'  |

Supplementary Table 5: List of morpholino antisense oligonucleotides.
